# Supplementary material for: Combinations of furoxan and 1,2,4-oxadiazole for the generation of high performance energetic materials
Source: Royal Society of Chemistry journal article supplement (doi:10.1039/c9dt02684c), 2019-01-01
Supplement: c9dt02684c1.pdf [file c9dt02684c1.pdf]

## Supporting Information

### **Combination furoxan and 1,2,4-oxadiazole for the generation of high-performance energetic materials.**

Hualin Xiong, Hongwei Yang, Caijin Lei, Pengjiu Yang, Wei Hu and Guangbin Cheng \*

School of Chemical Engineering, Nanjing University of Science and Technology Nanjing 210094, P. R. China

**Email: [gcheng@mail.njust.edu.cn](mailto:gcheng@mail.njust.edu.cn)**

## Table of Contents

|                                                                                     |       |
|-------------------------------------------------------------------------------------|-------|
| 1. Computational details.....                                                       | 1-2   |
| 2. Crystallographic data.....                                                       | 3-7   |
| 3. <sup>1</sup> H NMR and <sup>13</sup> C NMR of compounds 2-4, 3a-d and 4a-c. .... | 8-16  |
| 4. The DSC plots of compounds 3, 4, 3a-d, 4a-c, RDX, HMX and CL-20.....             | 17-21 |
| 5. Reference.....                                                                   | 22    |

## 1. Computational details

Computations were performed by using the Gaussian09 suite of programs.<sup>1</sup> The elementary geometric optimization and the frequency analysis were performed at the level of the Becke three parameter, Lee-Yan-Parr (B3LYP) functional with the 6-311+G\*\* basis set.<sup>2-4</sup> All of the optimized structures were characterized to be local energy minima on the potential surface without any imaginary frequencies. Atomization energies were calculated by the CBS-4M.<sup>5</sup> All the optimized structures were characterized to be true local energy minima on the potential-energy surface without imaginary frequencies.

The predictions of heats of formation (HOF) of compounds used the hybrid DFTB3LYP methods with the 6-311+G\*\* basis set through designed isodesmic reactions. The isodesmic reaction processes, that is, the number of each kind of formal bond is conserved, were used with the application of the bond separation reaction (BSR) rules. The molecule was broken down into a set of two heavy-atom molecules containing the same component bonds. The isodesmic reactions used to derive the HOF shown in Scheme S1-S4.

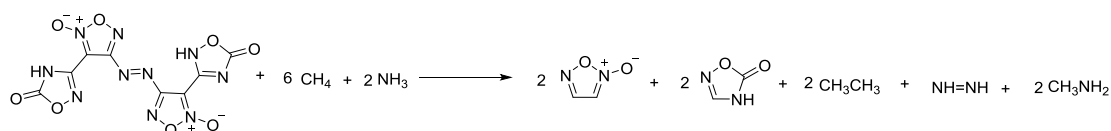

**Scheme 1.** The isodesmic reactions for calculating heat of formation for **3**.

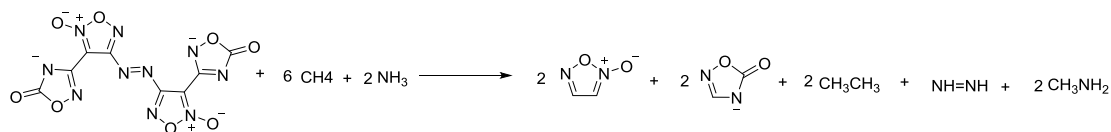

**Scheme 2.** The isodesmic reactions for calculating heat of formation for the anion of **3**.

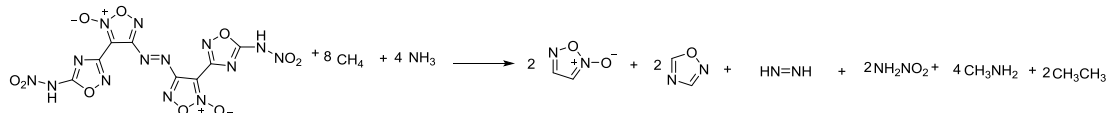

**Scheme 3.** The isodesmic reactions for calculating heat of formation for **4**

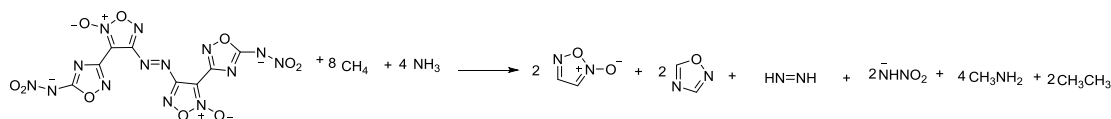

**Scheme 4.** The isodesmic reactions for calculating heat of formation for anion of **3**.

The change of enthalpy for the reactions at 298K can be expressed by Equation (1):

$$\Delta H_{298} = \sum \Delta_f H_P - \sum \Delta_f H_R \quad (1)$$

Where  $\sum \Delta_f H_P$  and  $\sum \Delta_f H_R$  are the HOF of the reactants and products at 298 K, respectively, and  $\Delta H_{298}$  can be calculated from the following expression in Equation (2):

$$\Delta H_{298} = \Delta E_{298} + \Delta(PV) = \Delta E_0 + \Delta ZPE + \Delta H_T + \Delta nRT \quad (2)$$

where  $\Delta E_0$  is the change in total energy between the products and the reactants at 0 K;  $\Delta ZPE$  is the difference between the zero-point energies (ZPE) of the products and the reactants at 0 K;  $\Delta H_T$  is the thermal correction from 0 to 298 K. The  $\Delta(PV)$  value in Equation(2) is the  $PV$  work term. It equals  $\Delta nRT$  for the reactions of an ideal gas. For the isodesmic reactions  $\Delta n = 0$ , so  $\Delta(PV) = 0$ . On the left side of Equation (2), apart from target compound all the others are called reference

compounds. The HOF of reference compounds are available either from experiments or from the high level computing such as CBS-4M.

Based on a Born-Haber energy cycle (Scheme S5), the heat of formation of a salt can be simplified by Equation (3):

$$\Delta H_f^\circ(\text{ionic salt, 298 K}) = \Delta H_f^\circ(\text{cation, 298 K}) + \Delta H_f^\circ(\text{anion, 298 K}) - \Delta H_L \quad (3)$$

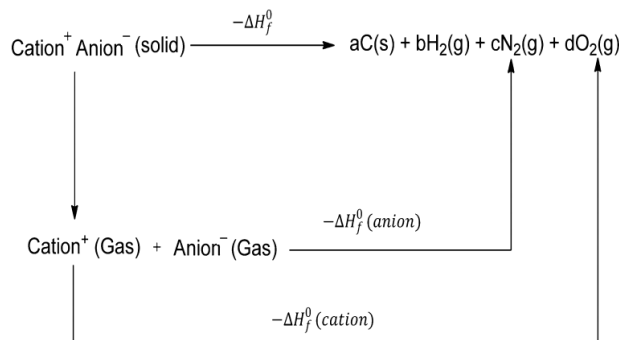

**Scheme S5** Born–Haber cycle for the formation of energetic salts

where  $\Delta H_L$  is the lattice energy of the salt which could be predicted by the formula suggested by Jenkins et al.<sup>4</sup> as given in Equation (4):

$$\Delta H_L = U_{\text{POT}} + [p(n_M/2-2) + q(n_X/2-2)]RT \quad (4)$$

where  $n_M$  and  $n_X$  depend on the nature of the ions  $\text{M}^+$  and  $\text{X}^-$ , respectively, and are equal to 3 for monatomic ions, 5 for linear polyatomic ions, and 6 for nonlinear polyatomic ions. The equation for lattice potential energy  $U_{\text{POT}}$  takes the form of equation (5):

$$U_{\text{POT}}(\text{kJ mol}^{-1}) = \gamma(\rho_m/M_m)^{1/3} + \delta \quad (5)$$

where  $\rho_m$  is the density ( $\text{g cm}^{-3}$ ),  $M_m$  is the chemical formula mass of the ionic material and the coefficients  $\gamma$  ( $\text{kJ} \cdot \text{mol}^{-1} \text{cm}$ ) and  $\delta$  ( $\text{kJ mol}^{-1}$ ) are 8375.6 and -178.8, respectively.

**Table S1.** Calculated zero-point energy (ZPE), thermal correction to enthalpy ( $H_T$ ), total energy ( $E_0$ ) and heats of formation (HOF)

| Compound                        | $E_0$ / a.u. | ZPE / $\text{kJ mol}^{-1}$ | $\Delta H_T$ / $\text{kJ mol}^{-1}$ | HOF/ $\text{kJ mol}^{-1}$ |
|---------------------------------|--------------|----------------------------|-------------------------------------|---------------------------|
| <b>3</b>                        | -1455.301011 | 380.05                     | 57.53                               | 633.44                    |
| <b>4</b>                        | -1824.554989 | 451.4                      | 73.23                               | 1241.14                   |
| CH <sub>4</sub>                 | -40.5339263  | 112.26                     | 10.04                               | -74.60                    |
| NH <sub>3</sub>                 | -56.5826356  | 86.27                      | 10.05                               | -45.9                     |
| furoxan                         | -337.3042877 | 124.09                     | 14.34                               | 224.73                    |
| 1,2,4- oxadiazole               | -262.1529348 | 116.9                      | 11.67                               | 99.8                      |
| NH <sub>2</sub> NO <sub>2</sub> | -261.1248168 | 98.79                      | 12.39                               | -3.9                      |
| CH <sub>3</sub> NO <sub>2</sub> | -245.0915559 | 124.93                     | 11.60                               | -80.80                    |
| CH <sub>3</sub> CH <sub>3</sub> | -79.8565413  | 187.31                     | 11.79                               | -84.01                    |
| NHNO <sub>2</sub>               | -260.5730748 | 65.76                      | 11.37                               | -120.22                   |
| NHNH                            | -110.679524  | 70.35                      | 10.03                               | 194.97                    |
| CH <sub>3</sub> NH <sub>2</sub> | -95.8938402  | 160.78                     | 11.64                               | -22.5                     |
| 1,2,4-oxadiazol-5(4H)-one       | -337.4295337 | 128.36                     | 14.48                               | -128.96                   |
| 1,2,4-oxadiazol-5-one           |              |                            |                                     | -285.12                   |
| anion                           | -336.894443  | 95.94                      | 13.5                                |                           |

## 2. Crystallographic data

**Table S2 Crystallographic data for compounds 3 and 4a**

| Empirical formula                     | C <sub>8</sub> H <sub>2</sub> N <sub>10</sub> O <sub>8</sub> CH <sub>3</sub> COCH <sub>3</sub> | C <sub>8</sub> H <sub>8</sub> N <sub>16</sub> O <sub>10</sub> 2H <sub>2</sub> O |
|---------------------------------------|------------------------------------------------------------------------------------------------|---------------------------------------------------------------------------------|
| Formula weight                        | 424.27                                                                                         | 524.34                                                                          |
| Temperature/K                         | 100                                                                                            | 173                                                                             |
| Crystal system                        | monoclinic                                                                                     | monoclinic                                                                      |
| Space group                           | P2 <sub>1</sub> /c                                                                             | C2/c                                                                            |
| a/Å                                   | 14.572(3)                                                                                      | 29.577(3)                                                                       |
| b/Å                                   | 11.493(2)                                                                                      | 5.0295(4)                                                                       |
| c/Å                                   | 9.5435(18)                                                                                     | 14.2565(12)                                                                     |
| α/°                                   | 90                                                                                             | 90                                                                              |
| β/°                                   | 98.872(7)                                                                                      | 92.983(3)                                                                       |
| γ/°                                   | 90                                                                                             | 90                                                                              |
| Volume/Å <sup>3</sup>                 | 1579.1(5)                                                                                      | 2117.9(3)                                                                       |
| Z                                     | 4                                                                                              | 4                                                                               |
| ρ <sub>calc</sub> /mg/mm <sup>3</sup> | 1.785                                                                                          | 1.644                                                                           |
| m/mm <sup>-1</sup>                    | 0.157                                                                                          | 0.152                                                                           |
| F(000)                                | 864.0                                                                                          | 1072.0                                                                          |
| Crystal size/mm <sup>3</sup>          | 0.12 × 0.08 × 0.05                                                                             | 0.14 × 0.08 × 0.05                                                              |
| 2θ range for data collection          | 4.534 to 52.894                                                                                | 3.111 to 25.020                                                                 |
| Index ranges                          | -18 ≤ h ≤ 17, -12 ≤ k ≤ 14,<br>-11 ≤ l ≤ 11                                                    | -33 ≤ h ≤ 34, -5 ≤ k ≤ 5,<br>-16 ≤ l ≤ 16                                       |
| Reflections collected                 | 9208                                                                                           | 6910                                                                            |
| Independent reflections               | 3204 [R <sub>int</sub> = 0.0538, R <sub>sigma</sub> = 0.0614]                                  | 1836 [R <sub>int</sub> = 0.0624]                                                |
| Data/restraints/parameters            | 3204/0/273                                                                                     | 1836 / 22 / 181                                                                 |
| Goodness-of-fit on F <sup>2</sup>     | 0.953                                                                                          | 1.169                                                                           |
| Final R indexes [I ≥ 2σ(I)]           | 0.0465, 0.1190                                                                                 | 0.0691, 0.1790                                                                  |
| Final R indexes [all data]            | 0.0777, 0.1532                                                                                 | 0.1134, 0.2079                                                                  |
| CCDC                                  | 1936651                                                                                        | 1825381                                                                         |

**Table S3 Selected bond lengths [Å] and angles [°] for 3**

|       |          |        |          |
|-------|----------|--------|----------|
| O1-N3 | 1.454(3) | O8-N7  | 1.346(3) |
| O1-N4 | 1.359(3) | O8-N8  | 1.481(3) |
| O2-N3 | 1.219(3) | O9-C10 | 1.231(3) |
| O3-N1 | 1.418(3) | N1-C2  | 1.302(3) |
| O3-C1 | 1.370(3) | N2-C2  | 1.359(3) |
| O4-C1 | 1.201(3) | N2-C1  | 1.365(3) |
| O5-C8 | 1.197(3) | N3-C3  | 1.326(3) |
| O6-N9 | 1.421(3) | N4-C4  | 1.311(3) |
| O6-C8 | 1.363(3) | N5-C4  | 1.422(3) |
| O7-N8 | 1.211(3) | N5-N6  | 1.254(3) |
| N6-C5 | 1.396(3) | C5-C6  | 1.431(4) |

|               |            |               |            |
|---------------|------------|---------------|------------|
| N7 -C5        | 1.311(3)   | C6 -C7        | 1.444(4)   |
| N8 -C6        | 1.329(3)   | C9 -C10       | 1.491(4)   |
| N9 -C7        | 1.300(3)   | C10-C11       | 1.489(4)   |
| N10-C7        | 1.362(3)   | C9 -H9A       | 0.9800     |
| N10-C8        | 1.372(3)   | C9 -H9B       | 0.9800     |
| N2 -H2        | 0.8800     | C9 -H9C       | 0.9800     |
| N10-H10       | 0.8800     | C11-H11A      | 0.9800     |
| C2 -C3        | 1.440(3)   | C11-H11B      | 0.9800     |
| C3 -C4        | 1.412(3)   | C11-H11C      | 0.9800     |
| N3-O1 -N4     | 108.33(16) | N3 -C3 -C4    | 106.60(19) |
| N1-O3 -C1     | 109.28(18) | C2 -C3 -C4    | 131.8(2)   |
| N9-O6 -C8     | 109.80(19) | N3 -C3 -C2    | 121.6(2)   |
| N7-O8 -N8     | 107.62(17) | N5 -C4 -C3    | 124.5(2)   |
| O3-N1 -C2     | 104.36(19) | N4 -C4 -N5    | 123.5(2)   |
| C1-N2 -C2     | 107.3(2)   | N4 -C4 -C3    | 112.0(2)   |
| O1-N3 -O2     | 117.98(19) | N6 -C5 -C6    | 136.1(2)   |
| O1-N3 -C3     | 106.44(18) | N7 -C5 -C6    | 112.0(2)   |
| O2-N3 -C3     | 135.6(2)   | N6 -C5 -N7    | 111.9(2)   |
| O1-N4 -C4     | 106.65(19) | N8 -C6 -C5    | 105.8(2)   |
| N6-N5 -C4     | 111.0(2)   | N8 -C6 -C7    | 117.9(2)   |
| N5-N6 -C5     | 116.1(2)   | C5 -C6 -C7    | 136.3(2)   |
| O8-N7 -C5     | 107.9(2)   | N9 -C7 -N10   | 112.4(2)   |
| O7-N8 -O8     | 117.14(19) | N9 -C7 -C6    | 121.6(2)   |
| O7-N8 -C6     | 136.0(2)   | N10-C7 -C6    | 125.9(2)   |
| O8-N8 -C6     | 106.8(2)   | O5 -C8 -N10   | 130.6(2)   |
| O6-N9 -C7     | 104.5(2)   | O6 -C8 -N10   | 105.6(2)   |
| C7-N10-C8     | 107.7(2)   | O5 -C8 -O6    | 123.8(2)   |
| C2-N2 -H2     | 126.00     | O9 -C10-C9    | 121.9(3)   |
| C1-N2 -H2     | 126.00     | O9 -C10-C11   | 120.1(2)   |
| C7-N10-H10    | 126.00     | C9 -C10-C11   | 118.0(2)   |
| C8-N10-H10    | 126.00     | C10-C9 -H9A   | 109.00     |
| O3-C1 -O4     | 123.1(2)   | C10-C9 -H9B   | 109.00     |
| O3-C1 -N2     | 106.2(2)   | C10-C9 -H9C   | 109.00     |
| O4-C1 -N2     | 130.7(2)   | H9A-C9 -H9B   | 109.00     |
| N1-C2 -N2     | 113.0(2)   | H9A-C9 -H9C   | 110.00     |
| N1-C2 -C3     | 121.2(2)   | H9B-C9 -H9C   | 110.00     |
| N2-C2 -C3     | 125.8(2)   | C10-C11-H11A  | 109.00     |
| C10-C11-H11B  | 110.00     | H11A-C11-H11C | 109.00     |
| C10-C11-H11C  | 109.00     | H11B-C11-H11C | 109.00     |
| H11A-C11-H11B | 109.00     |               |            |

**Table S4** Selected torsion angles for [ **3** ]

|             |             |              |            |
|-------------|-------------|--------------|------------|
| N4-O1-N3-O2 | -178.23(19) | N5-N6 -C5-C6 | -2.3(4)    |
| N4-O1-N3-C3 | 0.8(2)      | O8-N7 -C5-N6 | 177.47(19) |

|              |           |               |           |
|--------------|-----------|---------------|-----------|
| N3-O1-N4-C4  | -0.5(2)   | O8-N7 -C5-C6  | -0.9(3)   |
| C1-O3-N1-C2  | 0.4(2)    | O7-N8 -C6-C5  | 178.6(3)  |
| N1-O3-C1-O4  | 177.1(2)  | O7-N8 -C6-C7  | 0.9(4)    |
| N1-O3-C1-N2  | -0.5(2)   | O8-N8 -C6-C5  | -0.5(3)   |
| C8-O6-N9-C7  | 0.8(3)    | O8-N8 -C6-C7  | -178.2(2) |
| N9-O6-C8-O5  | 178.9(2)  | O6-N9 -C7-N10 | -1.0(3)   |
| N9-O6-C8-N10 | -0.3(3)   | O6-N9 -C7-C6  | -179.1(2) |
| N8-O8-N7-C5  | 0.6(3)    | C8-N10-C7-N9  | 0.9(3)    |
| N7-O8-N8-O7  | -179.3(2) | C8-N10-C7-C6  | 178.9(2)  |
| N7-O8-N8-C6  | 0.0(2)    | C7-N10-C8-O5  | -179.5(3) |
| O3-N1-C2-N2  | -0.1(3)   | C7-N10-C8-O6  | -0.3(3)   |
| O3-N1-C2-C3  | -178.4(2) | N1-C2 -C3-N3  | 177.9(2)  |
| C2-N2-C1-O3  | 0.4(3)    | N1-C2 -C3-C4  | -1.8(4)   |
| C2-N2-C1-O4  | -176.9(3) | N2-C2 -C3-N3  | -0.2(4)   |
| C1-N2-C2-N1  | -0.2(3)   | N2-C2 -C3-C4  | -179.8(2) |
| C1-N2-C2-C3  | 178.0(2)  | N3-C3 -C4-N4  | 0.6(3)    |
| O1-N3-C3-C2  | 179.5(2)  | N3-C3 -C4-N5  | -178.5(2) |
| O1-N3-C3-C4  | -0.8(2)   | C2-C3 -C4-N4  | -179.7(2) |
| O2-N3-C3-C2  | -1.7(4)   | C2-C3 -C4-N5  | 1.2(4)    |
| O2-N3-C3-C4  | 178.0(3)  | N6-C5 -C6-N8  | -176.9(3) |
| O1-N4-C4-N5  | 179.0(2)  | N6-C5 -C6-C7  | 0.1(5)    |
| O1-N4-C4-C3  | 0.0(3)    | N7-C5 -C6-N8  | 0.9(3)    |
| C4-N5-N6-C5  | 179.1(2)  | N7-C5 -C6-C7  | 177.9(3)  |
| N6-N5-C4-N4  | 3.9(3)    | N8-C6 -C7-N9  | 1.1(4)    |
| N6-N5-C4-C3  | -177.2(2) | N8-C6 -C7-N10 | -176.7(2) |
| N5-N6-C5-N7  | 179.8(2)  | C5-C6 -C7-N9  | -175.7(3) |
| C5-C6-C7-N10 | 6.5(5)    |               |           |

**Table S5** Hydrogen bonds for [Å and °] **3**

| D—H ...A                      | d(D-H)/ Å | d(H...A)/ Å | d(D...A)/ Å | <(DHA)/ ° |
|-------------------------------|-----------|-------------|-------------|-----------|
| N2-H2 ...O2                   | 0.8800    | 2.4200      | 2.924(3)    | 117.00    |
| N2 -H2 ...O9 <sup>i</sup>     | 0.8800    | 1.8900      | 2.709(3)    | 154.00    |
| N10-H10 ...N1                 | 0.8800    | 2.2600      | 2.969(3)    | 138.00    |
| N10-H10 ...N5                 | 0.8800    | 2.2400      | 2.927(3)    | 135.00    |
| C11-H11A ...N9 <sup>iii</sup> | 0.9800    | 2.6100      | 3.505(4)    | 153.00    |

Symmetry Code: i: 1-x,1-y,1-z, ii: 2-x,1/2+y,3/2-z

**Table S6** Selected bond lengths [Å] and angles [°] for **4a·2H<sub>2</sub>O**

|       |          |           |          |
|-------|----------|-----------|----------|
| O1-N2 | 1.455(5) | N6 -C4    | 1.359(5) |
| O1-N3 | 1.367(5) | N8 -H8A_b | 0.97(5)  |
| O2-N2 | 1.212(6) | N8 -H8A   | 0.97(5)  |
| O3-N4 | 1.408(5) | N8 -H8D   | 0.96(5)  |
| O3-C4 | 1.348(5) | N8 -H8C_b | 0.97(5)  |
| O4-N7 | 1.249(4) | N8 -H8D_b | 0.96(6)  |

|                 |          |               |          |
|-----------------|----------|---------------|----------|
| O5-N7           | 1.248(5) | N8 -H8B_b     | 0.97(5)  |
| O6-H6A          | 0.8500   | N8 -H8C       | 0.97(5)  |
| O6-H6B          | 0.8500   | N8 -H8B       | 0.97(5)  |
| O6-H6'B         | 0.8500   | N9 -H9C       | 0.9000   |
| O6-H6'A         | 0.8500   | N9 -H9B       | 0.9000   |
| N1-N1_a         | 1.255(5) | N9 -H9A       | 0.9000   |
| N1-C2           | 1.407(6) | N9 -H9D       | 0.9000   |
| N2-C1           | 1.339(6) | C1 -C2        | 1.410(6) |
| N3-C2           | 1.311(5) | C1 -C3        | 1.454(6) |
| N4-C3           | 1.304(6) | N9'-H9'A      | 0.9000   |
| N5-C3           | 1.368(5) | N9'-H9'B      | 0.9000   |
| N5-C4           | 1.315(5) | N9'-H9'C      | 0.9000   |
| N6-N7           | 1.332(6) | N9'-H9'D      | 0.9000   |
| N2 -O1 -N3      | 108.1(3) | H8A -N8-H8D   | 110(5)   |
| N4 -O3 -C4      | 107.0(3) | H8A -N8-H8A_b | 81(4)    |
| H6A-O6 -H6B     | 110.00   | H8A -N8-H8B_b | 158(5)   |
| H6'A -O6'-H6'B  | 108.00   | H8A -N8-H8C_b | 49(5)    |
| N1_a -N1 -C2    | 111.7(3) | H8A -N8-H8D_b | 84(4)    |
| O1 -N2 -C1      | 107.1(4) | H8B -N8-H8C   | 109(5)   |
| O1 -N2 -O2      | 117.2(4) | H8B -N8-H8D   | 109(4)   |
| O2 -N2 -C1      | 135.7(4) | H8A_b-N8-H8B  | 158(5)   |
| O1 -N3 -C2      | 106.2(4) | H8B -N8-H8B_b | 68(4)    |
| O3 -N4 -C3      | 102.2(4) | H8B -N8-H8C_b | 92(5)    |
| C3 -N5 -C4      | 101.5(3) | H8B -N8-H8D_b | 55(4)    |
| N7 -N6 -C4      | 117.4(4) | H8C -N8-H8C_b | 155(5)   |
| O4 -N7 -N6      | 115.7(4) | H8A_b-N8-H8C  | 49(5)    |
| O5 -N7 -N6      | 123.5(3) | H8B_b-N8-H8C  | 92(5)    |
| O4 -N7 -O5      | 120.9(4) | H8C -N8-H8D_b | 74(5)    |
| H8B_b-N8 -H8D   | 55(4)    | H9A -N9-H9B   | 107.00   |
| H8A_b-N8 -H8D   | 84(4)    | H9B -N9-H9D   | 111.00   |
| H8A_b-N8 -H8B_b | 110(4)   | H9C -N9-H9D   | 109.00   |
| H8C_b-N8 -H8D   | 74(5)    | H9A -N9-H9C   | 110.00   |
| H8A_b-N8 -H8D_b | 110(5)   | H9A -N9-H9D   | 110.00   |
| H8B_b-N8 -H8C_b | 109(5)   | H9B -N9-H9C   | 111.00   |
| H8B_b-N8 -H8D_b | 109(4)   | C2 -C1-C3     | 133.3(4) |
| H8C_b-N8 -H8D_b | 110(5)   | N2 -C1-C3     | 121.3(4) |
| H8D -N8 -H8D_b  | 163(4)   | N2 -C1-C2     | 105.4(4) |
| H8C -N8 -H8D    | 110(5)   | N1 -C2-C1     | 125.2(3) |
| H8A_b-N8 -H8C_b | 109(5)   | N1 -C2-N3     | 121.5(4) |
| H8A -N8 -H8B    | 110(4)   | N3 -C2-C1     | 113.2(4) |
| H8A -N8 -H8C    | 109(5)   | N4 -C3-N5     | 116.6(4) |
| N4 -C3- C1      | 121.1(4) | H9'A-N9'-H9'C | 110.00   |
| N5 -C3- C1      | 122.3(4) | H9'A-N9'-H9'D | 110.00   |
| O3 -C4- N6      | 110.1(4) | H9'B-N9'-H9'C | 110.00   |



|    |               |          |               |        |
|----|---------------|----------|---------------|--------|
| N5 | -C4- N6       | 137.1(4) | H9'B-N9'-H9'D | 110.00 |
| O3 | -C4- N5       | 112.8(4) | H9'C-N9'-H9'D | 108.00 |
|    | H9'A-N9'-H9'B | 108.00   |               |        |

**Table S7** Selected torsion angles for [  $\eta$  ] **4a·2H<sub>2</sub>O**

|            |               |     |           |             |        |     |           |
|------------|---------------|-----|-----------|-------------|--------|-----|-----------|
| N2         | -O1-N3        | -C2 | -0.2(4)   | O1          | -N2-C1 | -C3 | 177.4(3)  |
| N3         | -O1-N2        | -O2 | 179.7(3)  | O2          | -N2-C1 | -C3 | -0.8(7)   |
| N3         | -O1-N2        | -C1 | 1.1(4)    | O1          | -N3-C2 | -C1 | -0.8(4)   |
| N4         | -O3-C4        | -N6 | -179.1(3) | O1          | -N3-C2 | -N1 | -178.5(3) |
| C4         | -O3-N4        | -C3 | -0.4(4)   | O3          | -N4-C3 | -C1 | -177.3(4) |
| N4         | -O3-C4        | -N5 | 0.6(5)    | O3          | -N4-C3 | -N5 | 0.1(5)    |
| C2         | -N1-N1_a-C2_a |     | -180.0(3) | C4          | -N5-C3 | -C1 | 177.5(4)  |
| N1_a-N1-C2 | -N3           |     | -32.5(5)  | C3          | -N5-C4 | -O3 | -0.5(4)   |
| N1_a-N1-C2 | -C1           |     | 150.1(4)  | C4          | -N5-C3 | -N4 | 0.2(5)    |
| O2         | -N2-C1        | -C2 | -179.7(5) | C3          | -N5-C4 | -N6 | 179.0(5)  |
| O1         | -N2-C1        | -C2 | -1.5(4)   | C4          | -N6-N7 | -O4 | -178.6(3) |
| C4         | -N6-N7        | -O5 | 0.4(5)    | C3-C1-C2-N1 |        |     | 0.4(7)    |
| N7         | -N6-C4        | -O3 | 177.3(3)  | C3-C1-C2-N3 |        |     | -177.2(4) |
| N7         | -N6-C4        | -N5 | -2.2(7)   | N2-C1-C3-N4 |        |     | -0.6(6)   |
| C2         | -C1-C3        | -N5 | 0.7(7)    | N2-C1-C3-N5 |        |     | -177.8(4) |
| N2         | -C1-C2        | -N1 | 179.1(3)  | C2-C1-C3-N4 |        |     | 177.9(4)  |
| N2         | -C1-C2        | -N3 | 1.5(5)    |             |        |     |           |

**Table S8** Hydrogen bonds for [Å and °] **4a·2H<sub>2</sub>O**

| D—H ...A    | d(D-H)/ Å              | d(H...A)/ Å | d(D...A)/ Å | <(DHA)/ ° |
|-------------|------------------------|-------------|-------------|-----------|
| O6-H6B...N6 | 0.8500 <sup>i</sup>    | 2.0100      | 2.858(10)   | 177.00    |
| N8-H8C...N1 | 0.97(5) <sup>ii</sup>  | 2.55(5)     | 3.308(3)    | 135(4)    |
| N8-H8C...N5 | 0.97(5) <sup>iii</sup> | 2.55(6)     | 3.247(4)    | 129(4)    |

Symmetry Code: i: x, -1+y, z ii: 1/2+x, -1/2+y, z, iii: 1/2+x, -3/2+y, z

### 3. $^1\text{H}$ NMR and $^{13}\text{C}$ NMR of compounds 2-4,3a-d and 4a-c

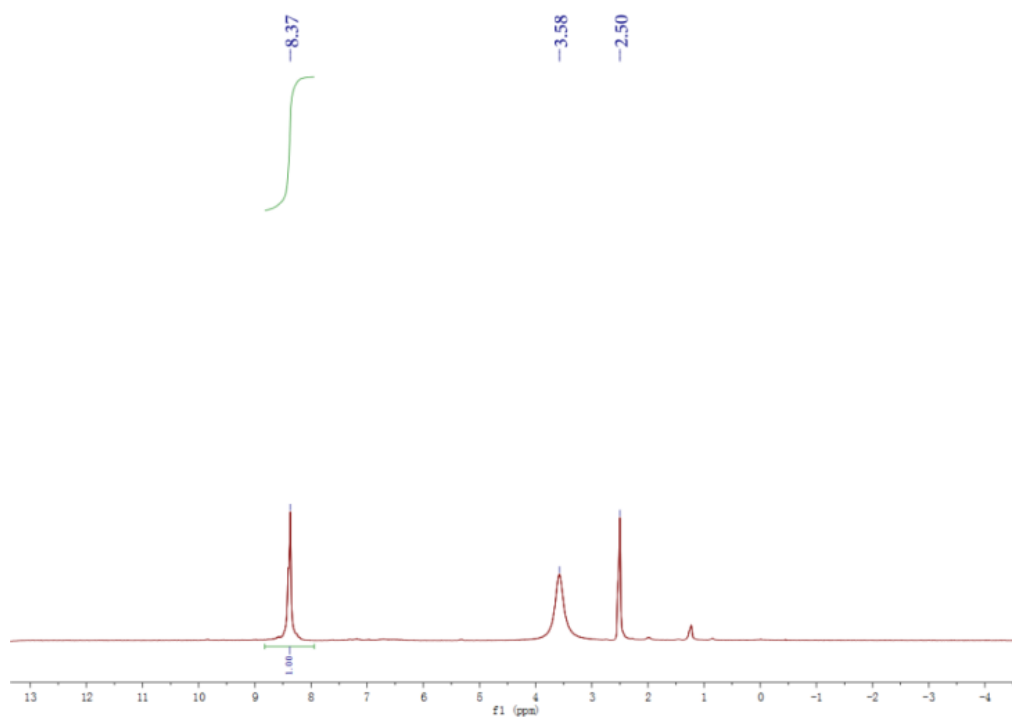

**Figure S1.**  $^1\text{H}$  NMR spectra in  $\text{DMSO-}d_6$  for compound **2**.

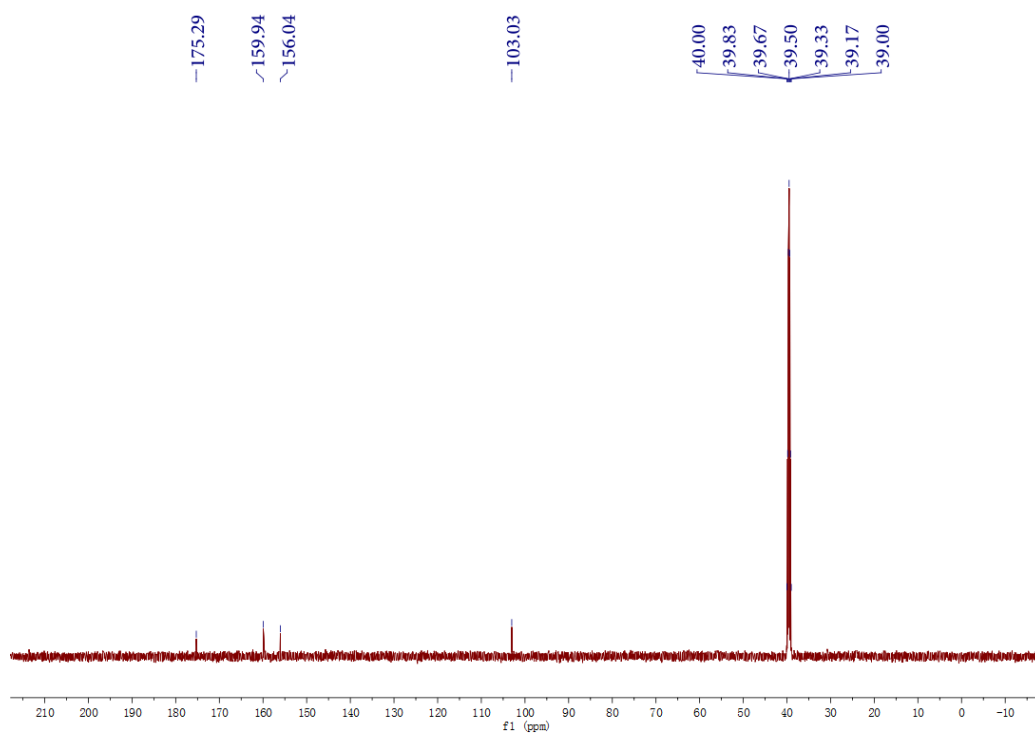

**Figure S2.**  $^{13}\text{C}$  NMR spectra in  $\text{DMSO-}d_6$  for compound **2**.

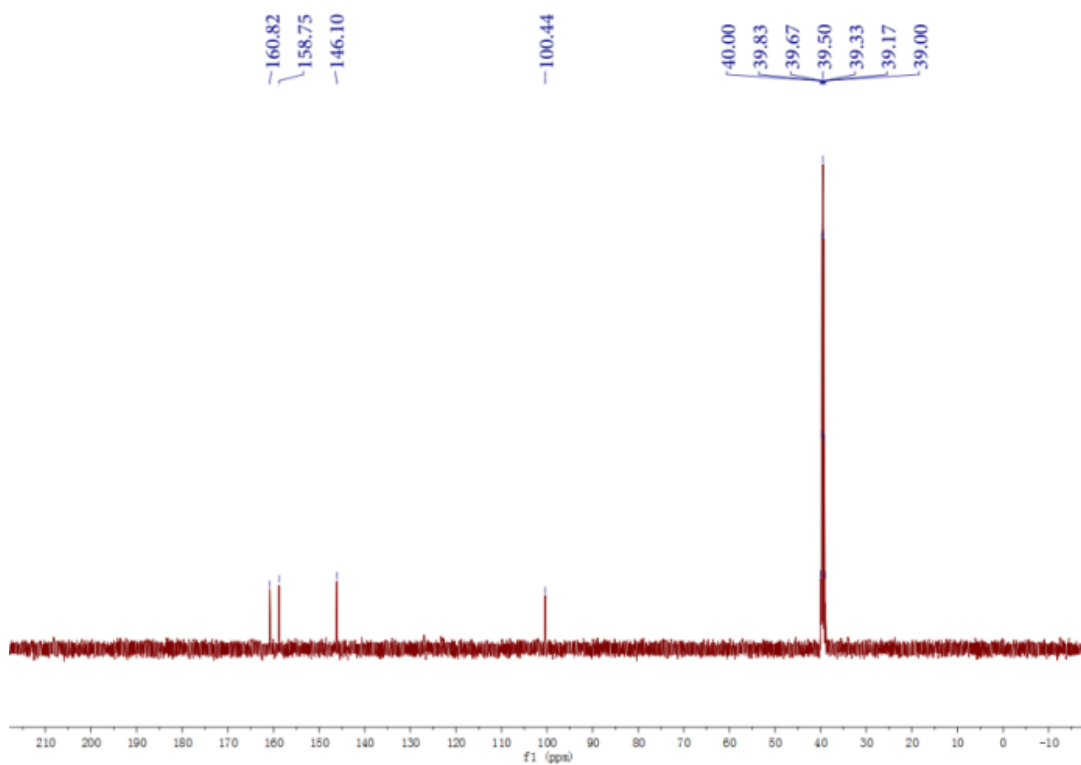

**Figure S3.**  $^{13}\text{C}$  NMR spectra in  $\text{DMSO-}d_6$  for compound **3**

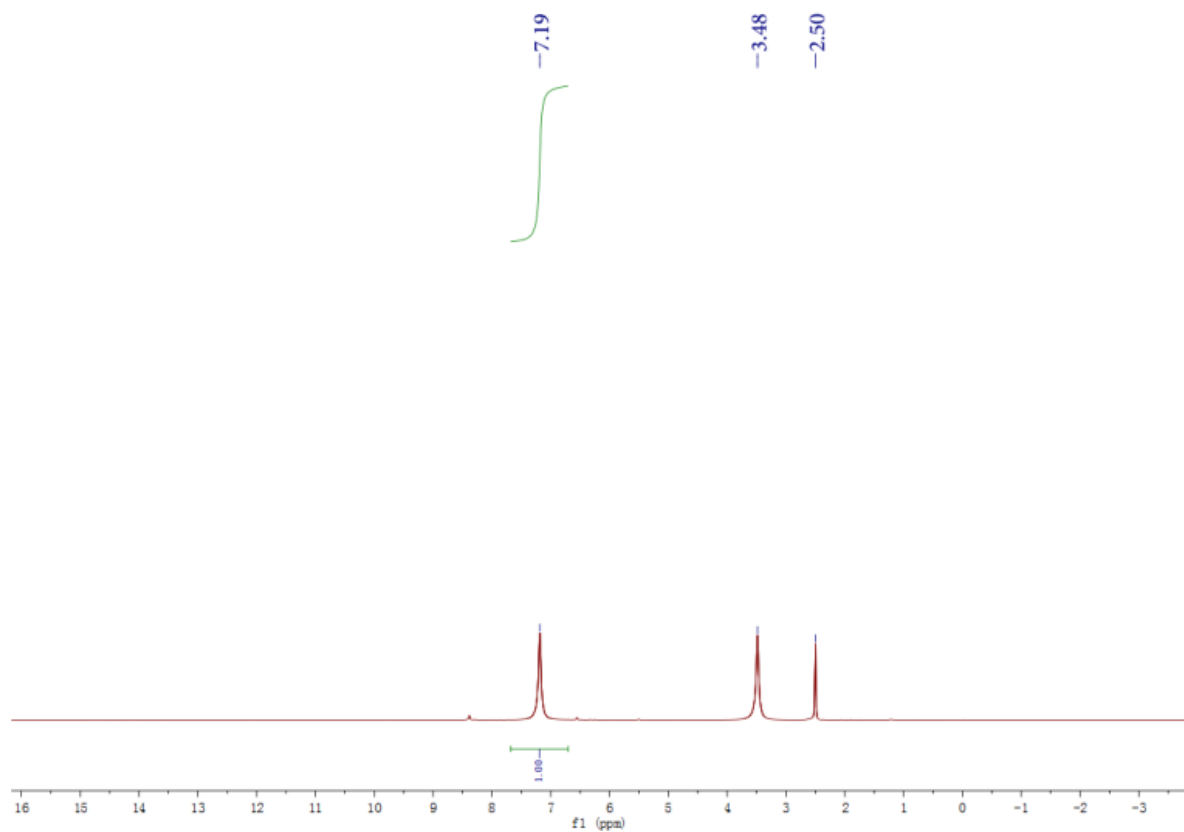

**Figure S4.**  $^1\text{H}$  NMR spectra in  $\text{DMSO-}d_6$  for compound **3a**

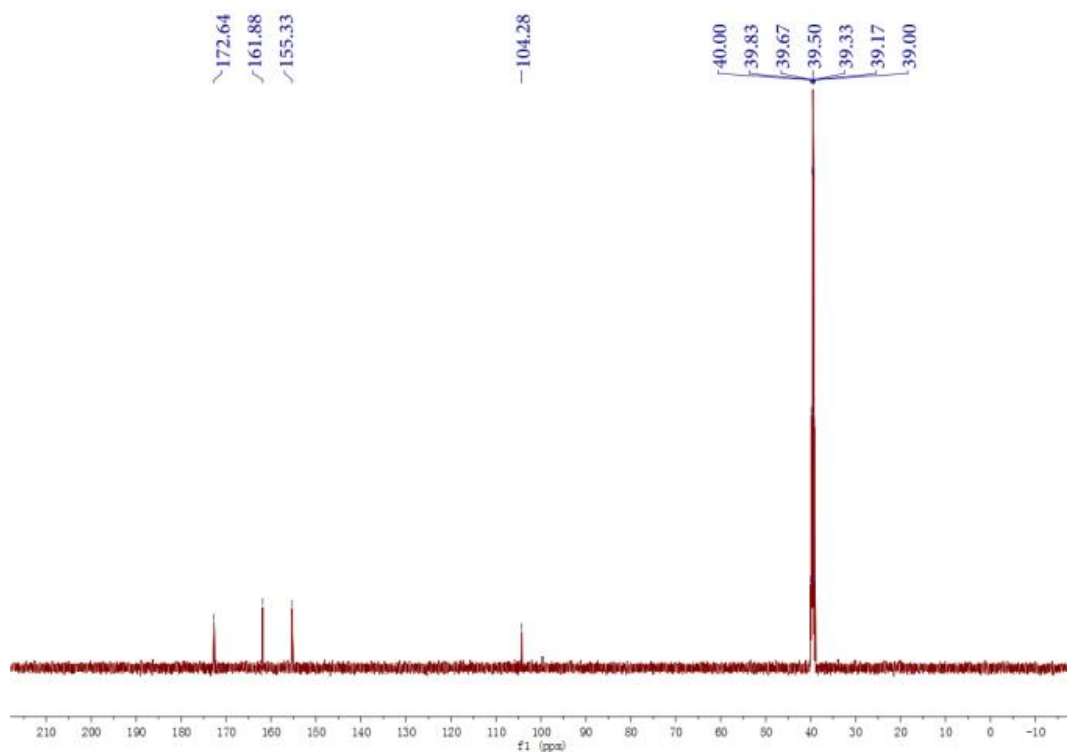

**Figure S5.**  $^{13}\text{C}$  NMR spectra in  $\text{DMSO-}d_6$  for compound **3a**

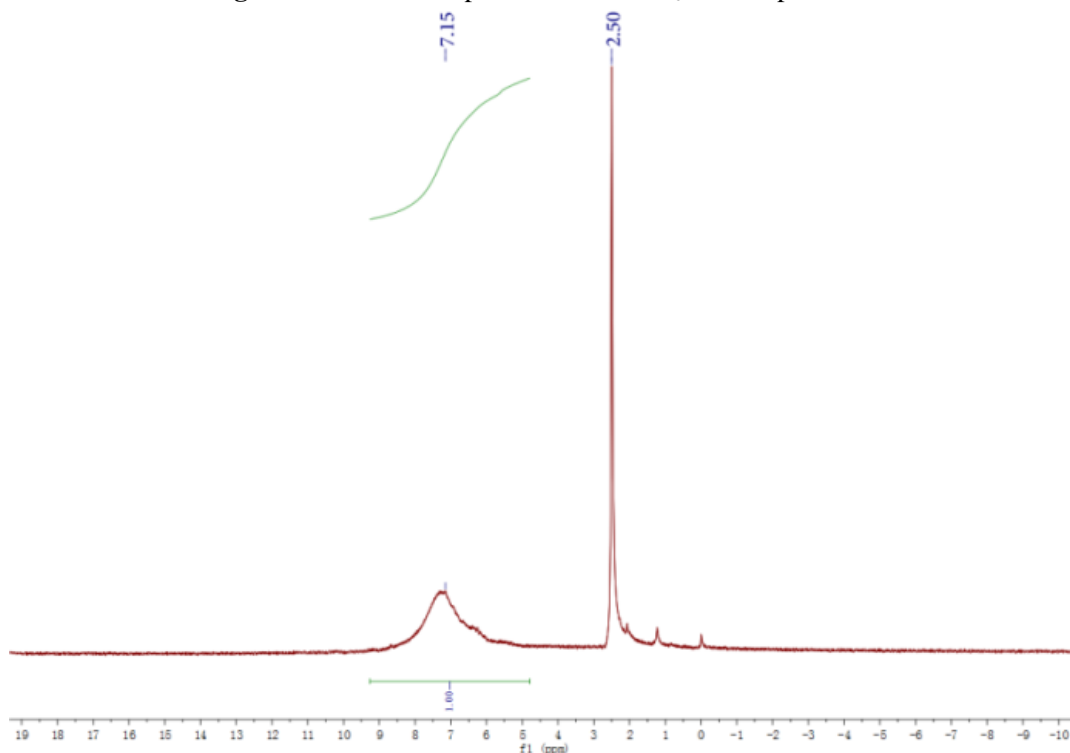

**Figure S6.**  $^1\text{H}$  NMR spectra in  $\text{DMSO-}d_6$  for compound **3b**

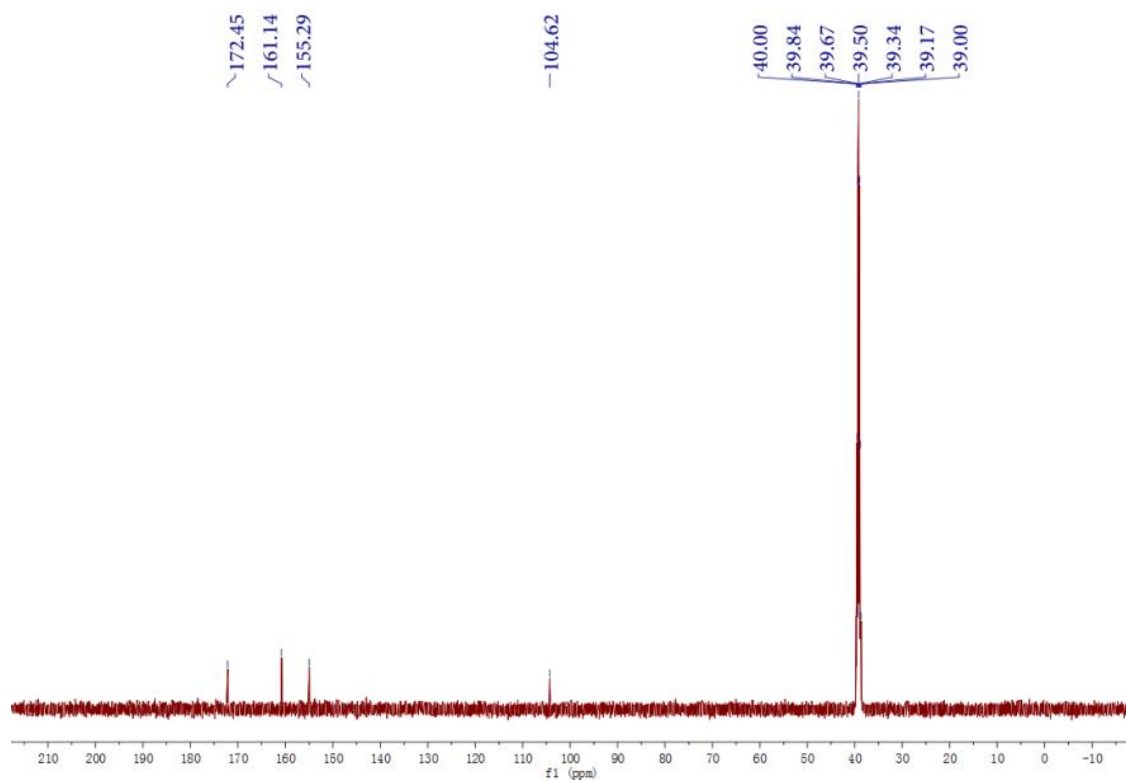

**Figure S7.**  $^{13}\text{C}$  NMR spectra in  $\text{DMSO-}d_6$  for compound **3b**

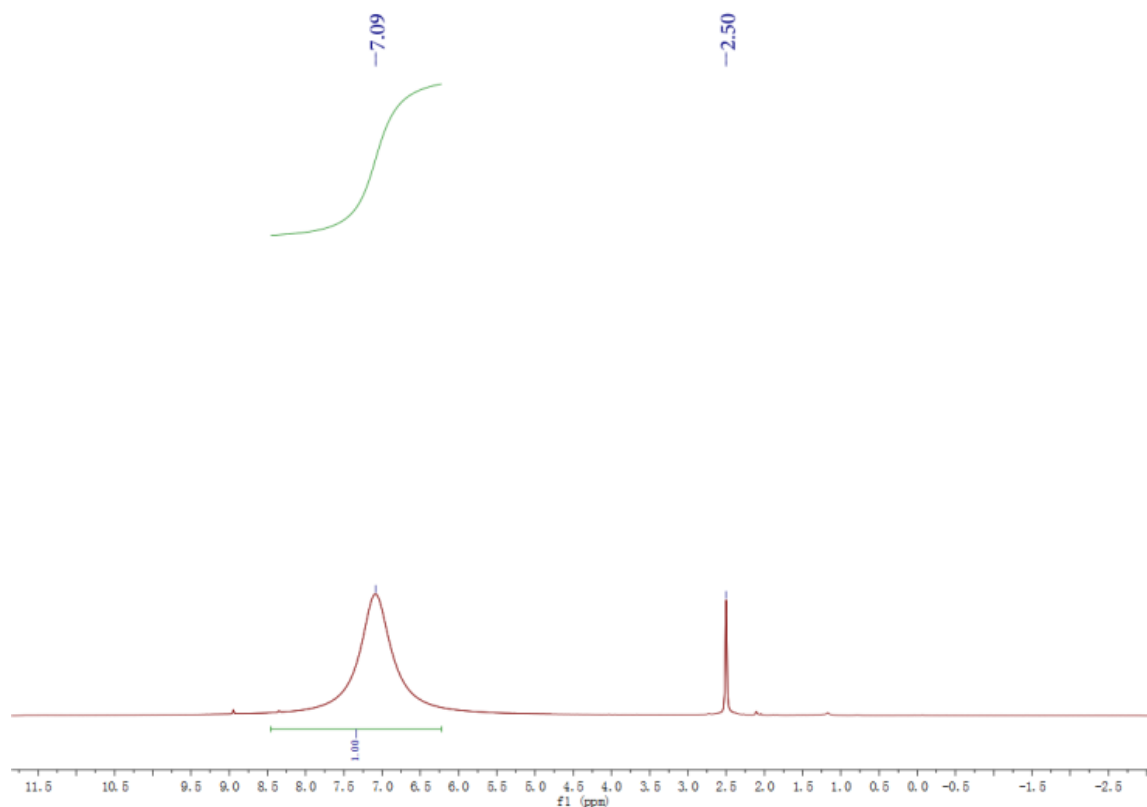

**Figure S8.**  $^1\text{H}$  NMR spectra in  $\text{DMSO-}d_6$  for compound **3c**

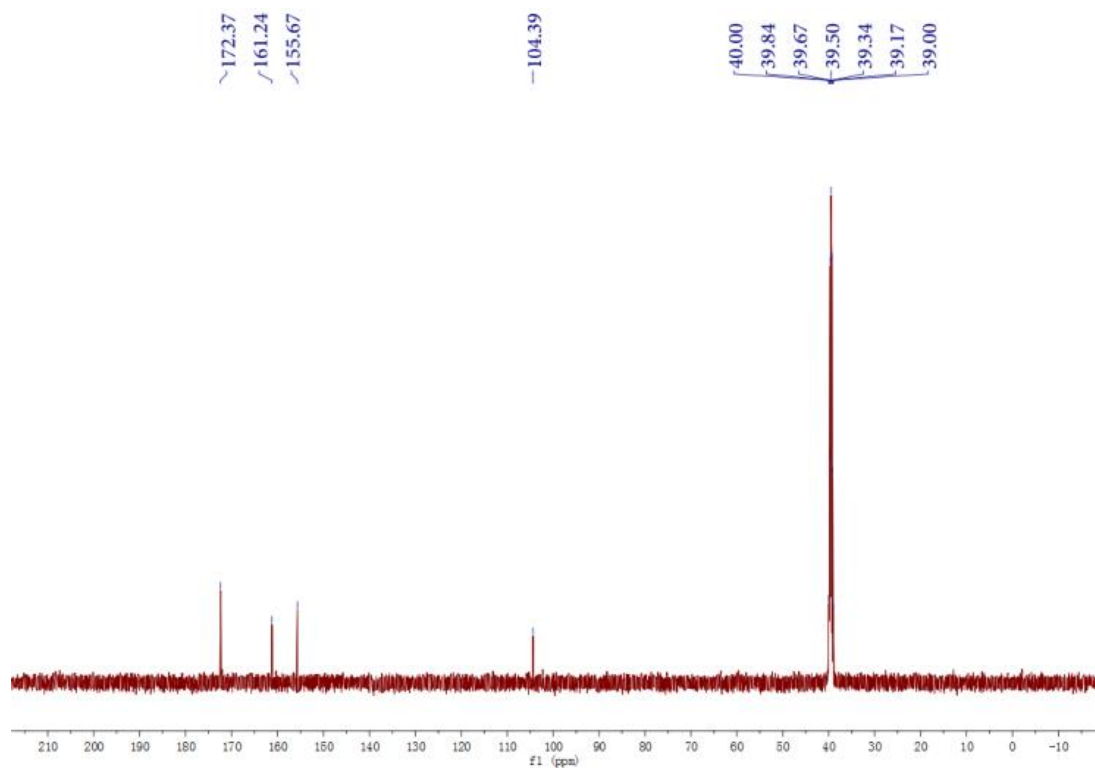

Figure S9.  $^{13}\text{C}$  NMR spectra in  $\text{DMSO-}d_6$  for compound **3c**

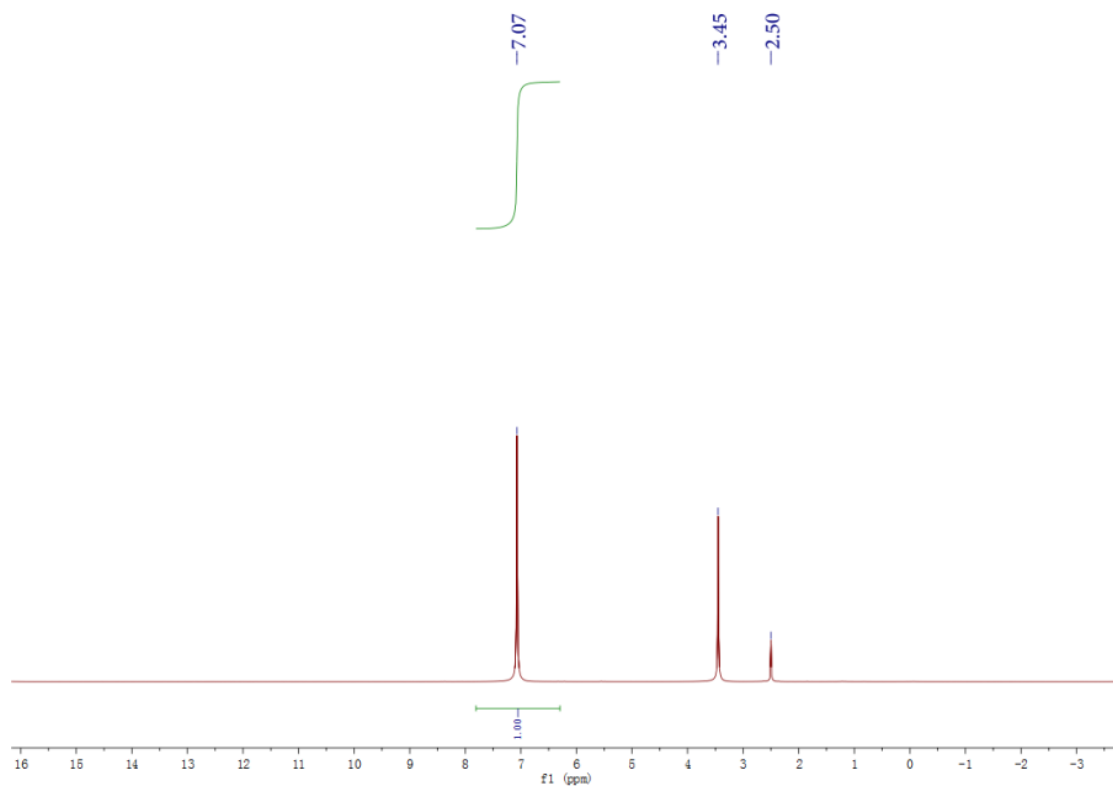

Figure S10.  $^1\text{H}$  NMR spectra in  $\text{DMSO-}d_6$  for compound **3d**

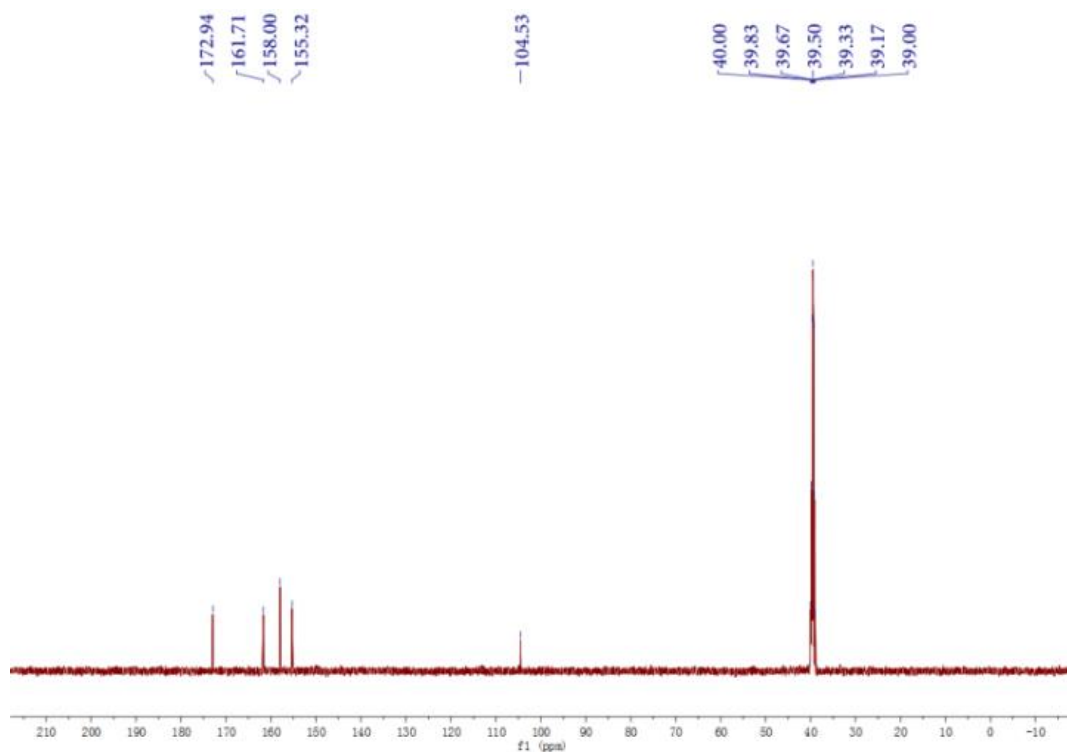

**Figure S11.**  $^{13}\text{C}$  NMR spectra in  $\text{DMSO-}d_6$  for compound **3d**

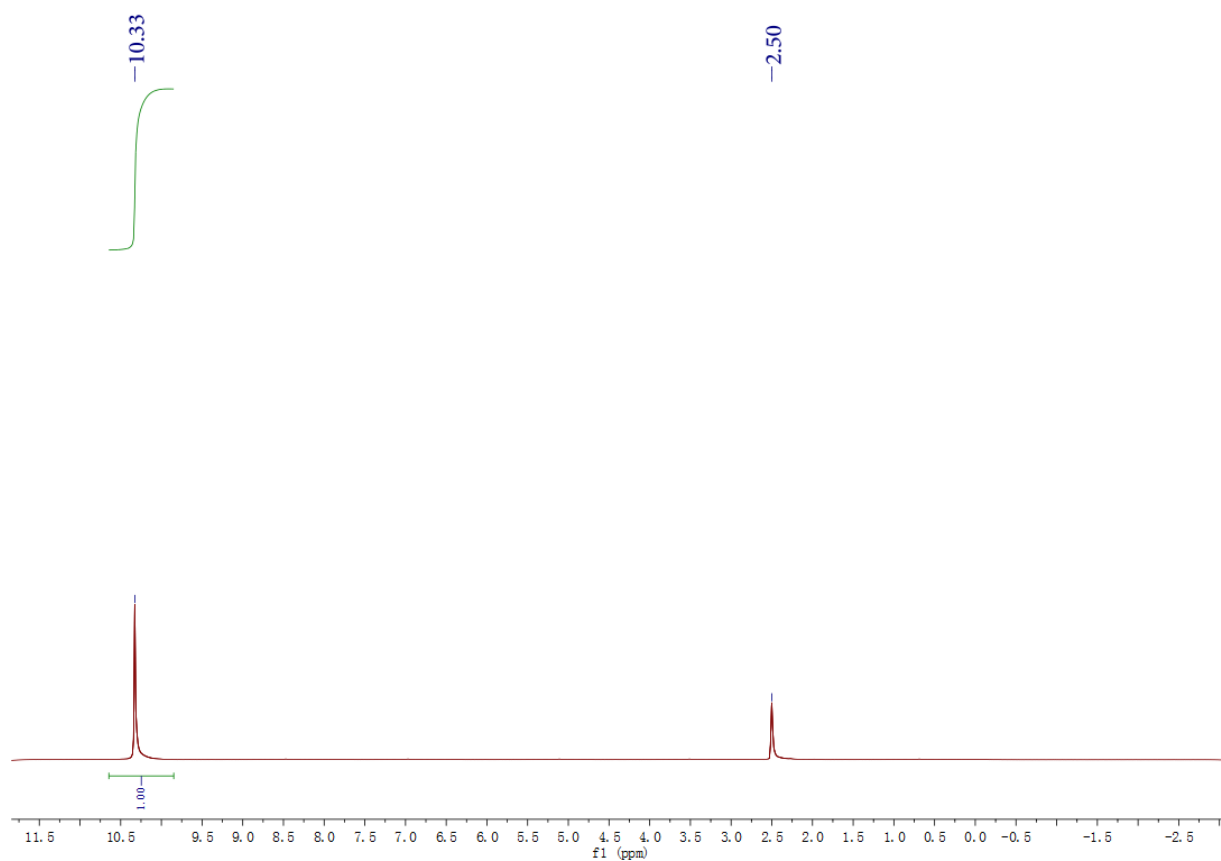

**Figure S12.**  $^1\text{H}$  NMR spectra in  $\text{DMSO-}d_6$  for compound **4**

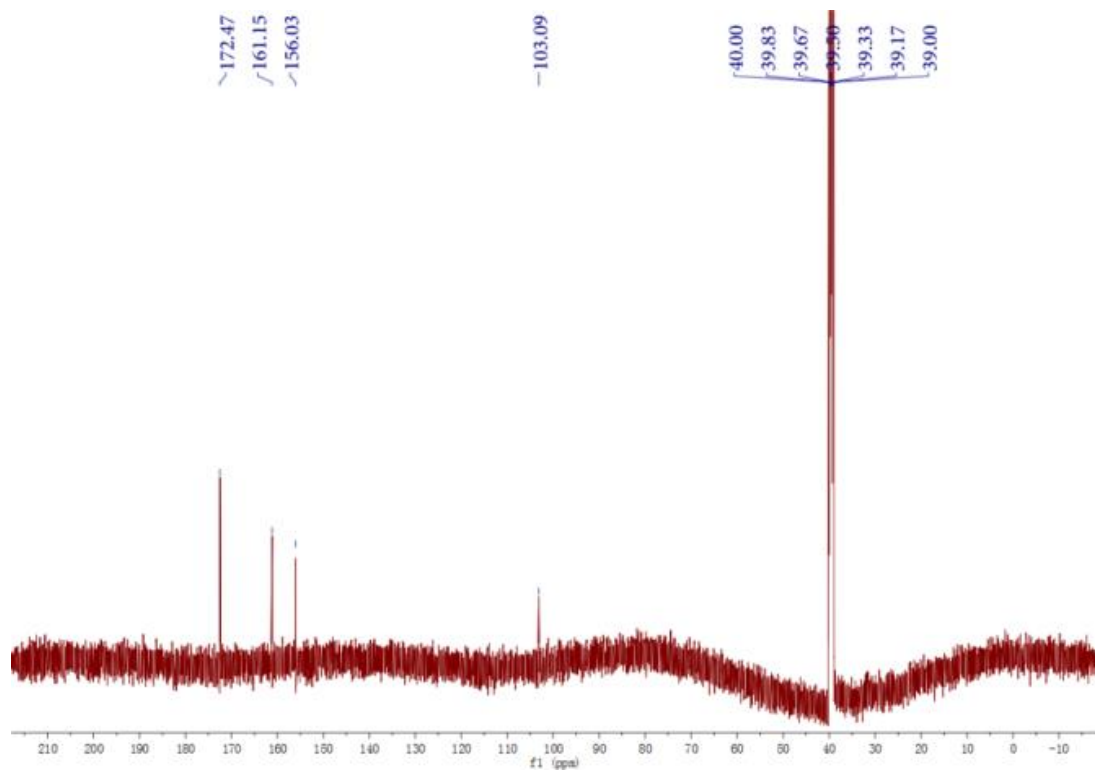

**Figure S13.**  $^{13}\text{C}$  NMR spectra in  $\text{DMSO-}d_6$  for compound **4**

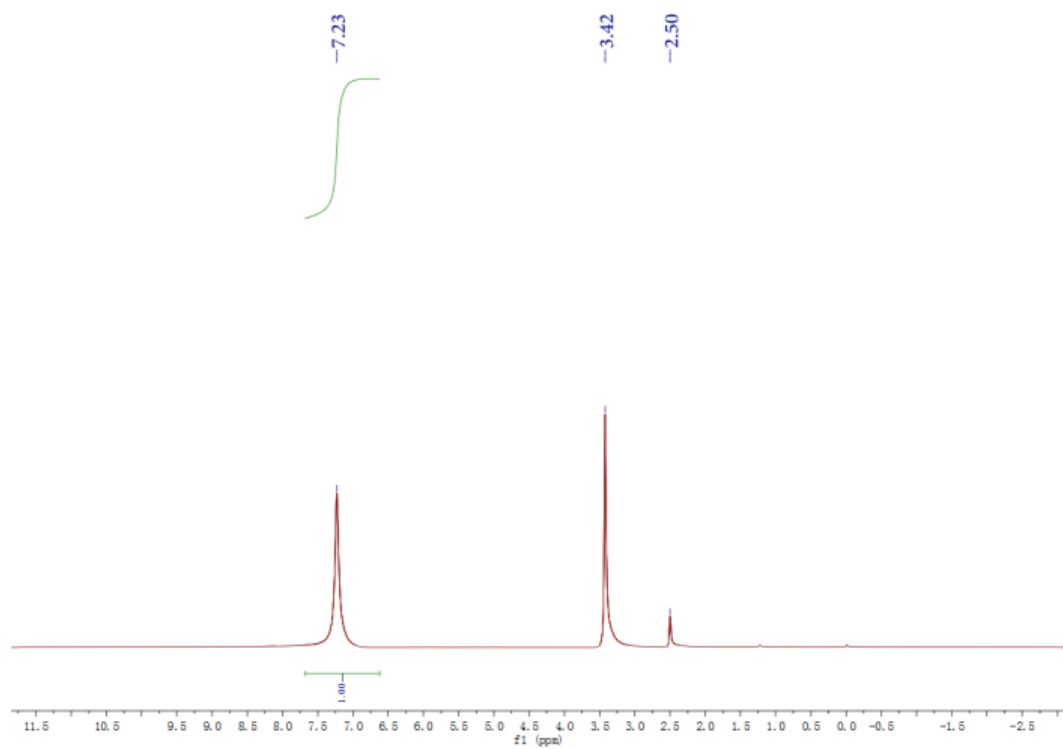

**Figure S14.**  $^1\text{H}$  NMR spectra in  $\text{DMSO-}d_6$  for compound **4a**



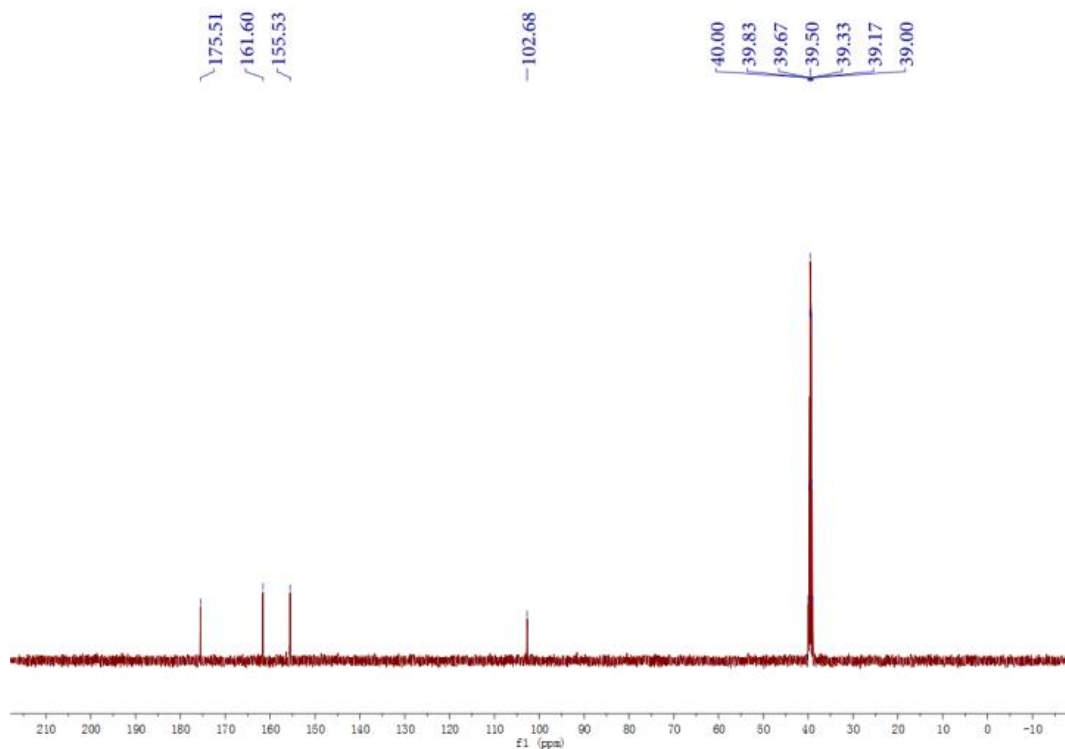

**Figure S15.**  $^{13}\text{C}$  NMR spectra in  $\text{DMSO-}d_6$  for compound **4a**

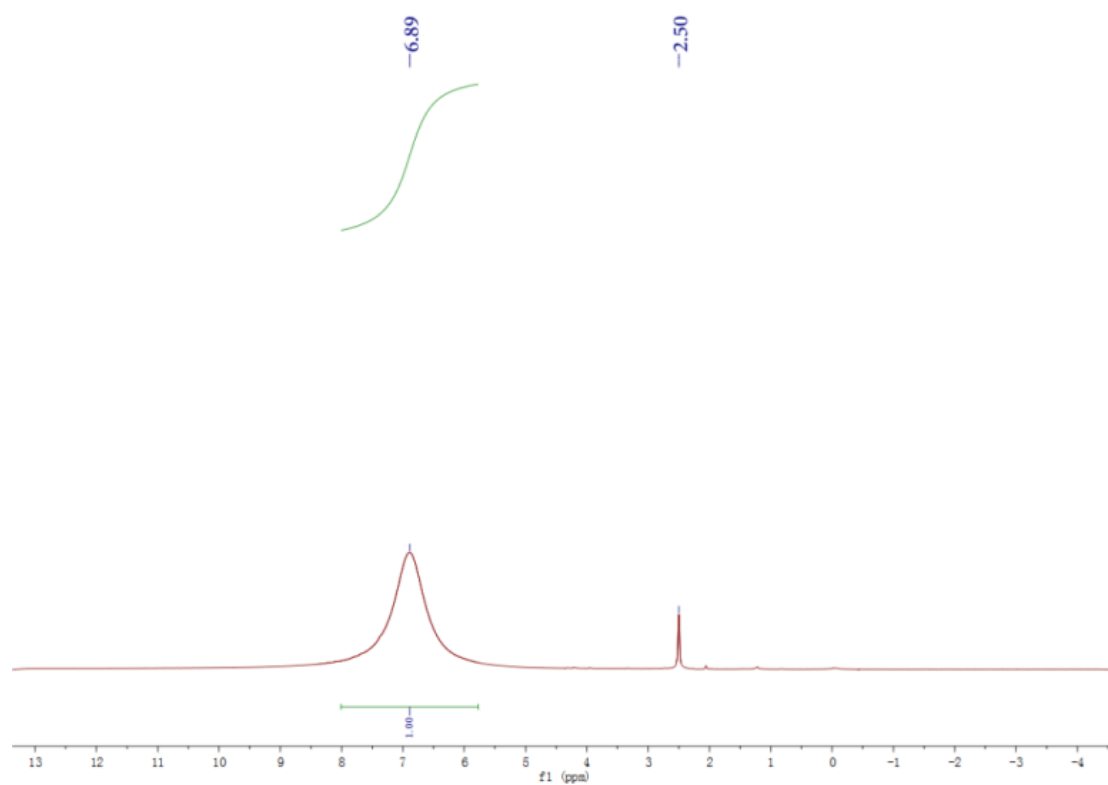

**Figure S16.**  $^1\text{H}$  NMR spectra in  $\text{DMSO-}d_6$  for compound **4b**

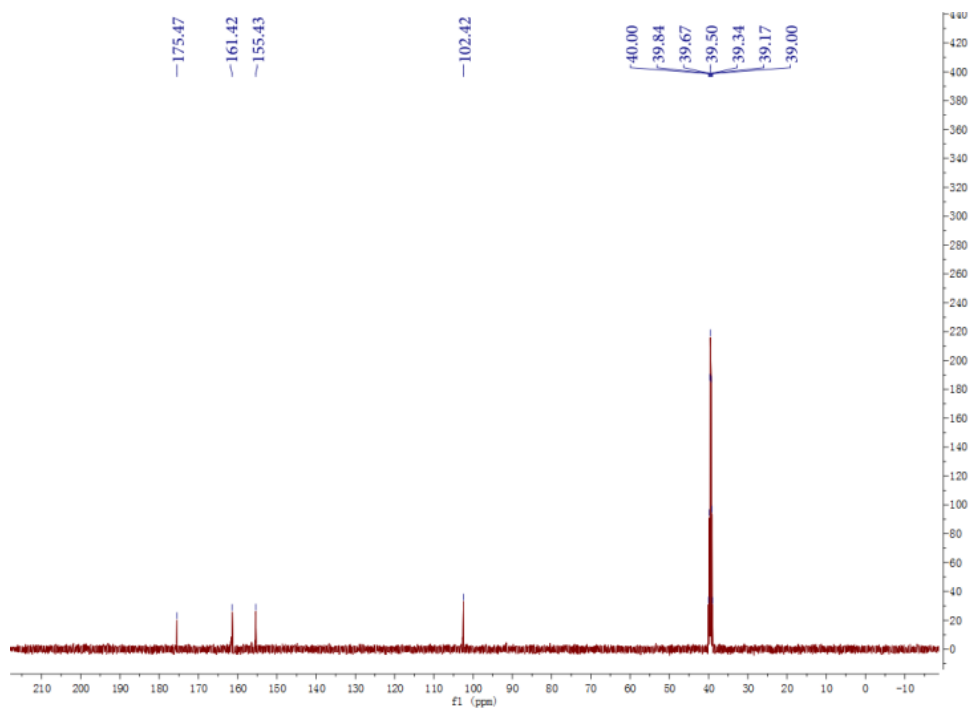

Figure S17.  $^{13}\text{C}$  NMR spectra in  $\text{DMSO-}d_6$  for compound **4b**

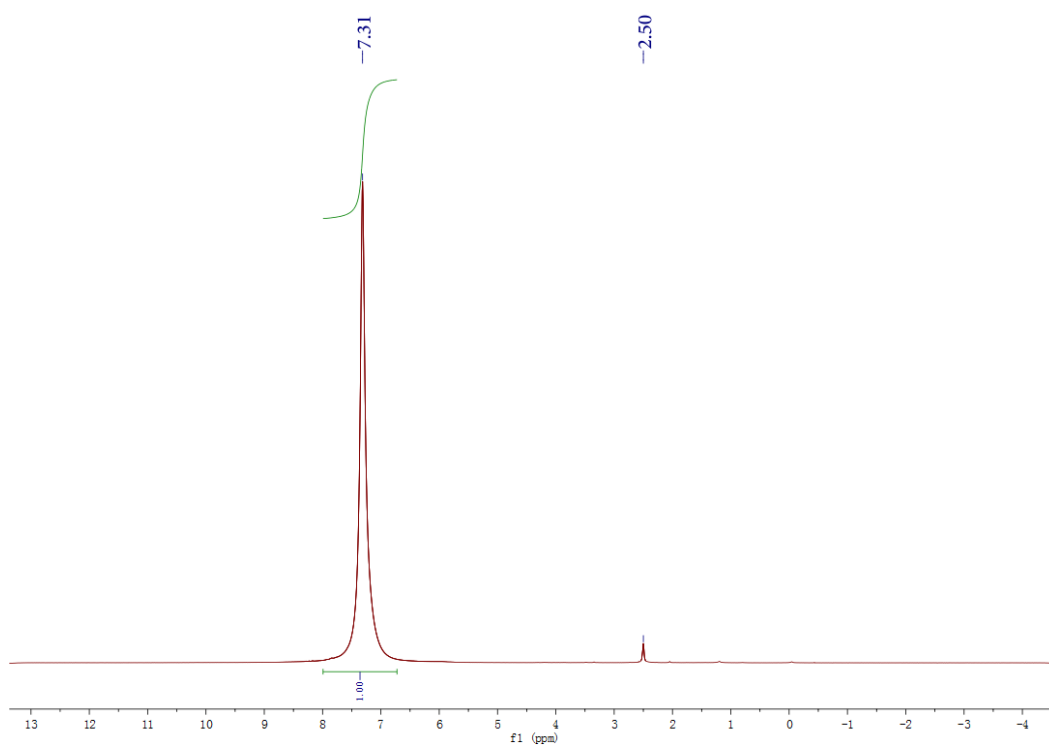

Figure S18.  $^1\text{H}$  NMR spectra in  $\text{DMSO-}d_6$  for compound **4c**

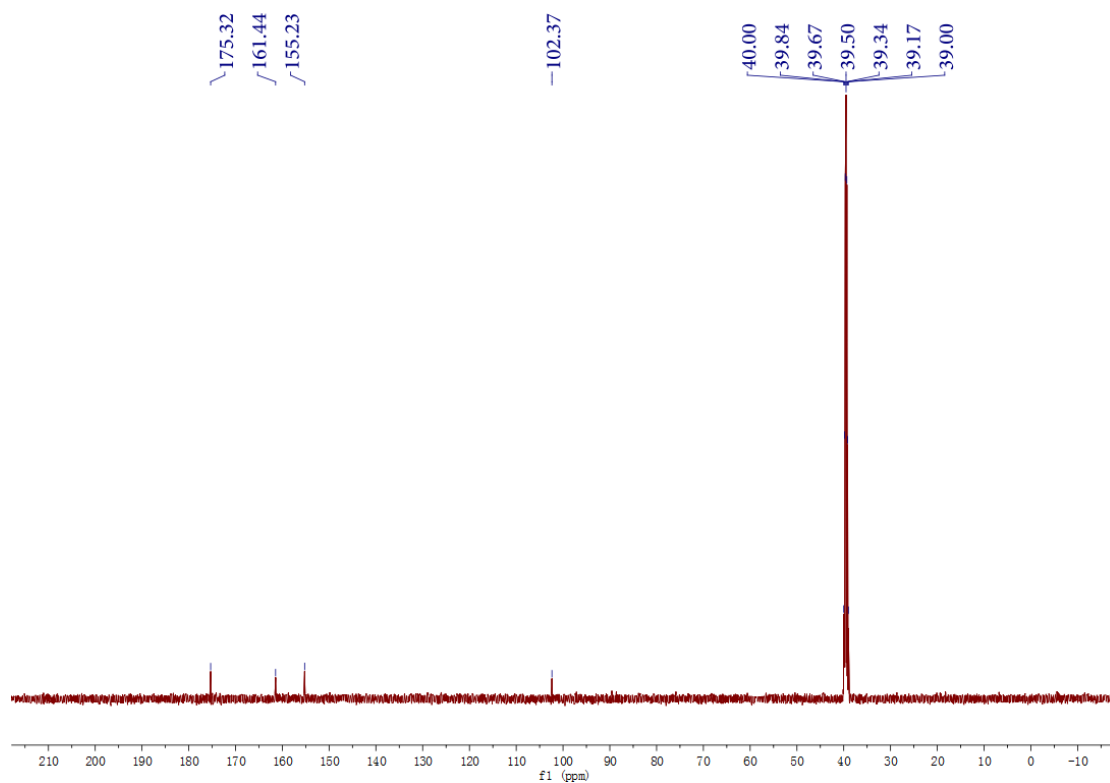

**Figure S19.**  $^{13}\text{C}$  NMR spectra in  $\text{DMSO-}d_6$  for compound **4c**

#### 4. The DSC plots of compounds **3**, **4**, **3a-d**, **4a-c**, **RDX**, **HMX** and **CL-20**.

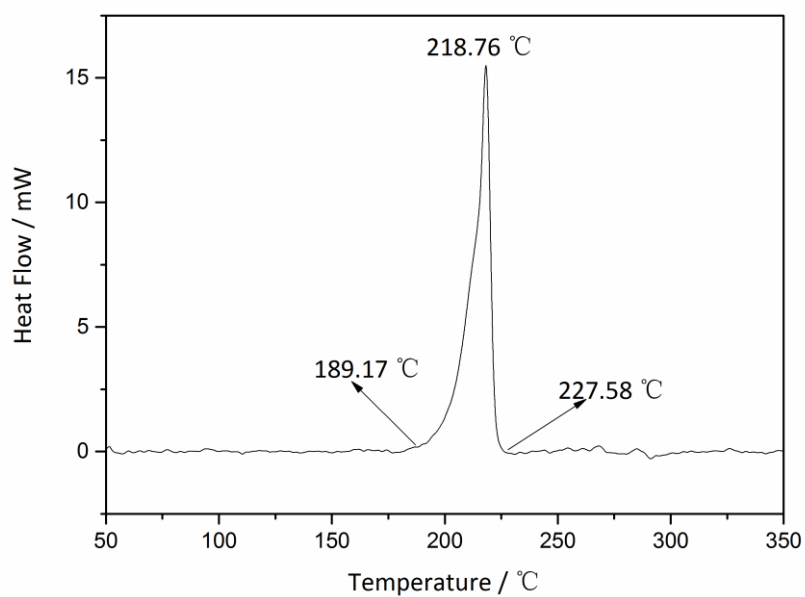

**Figure S20.** The DSC plot of compound **3**

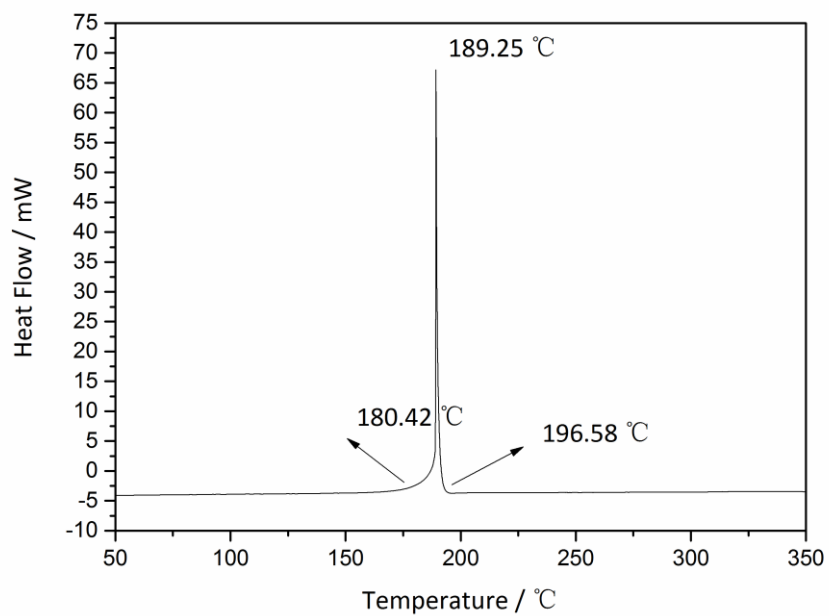

**Figure S21.** The DSC plot of compound **3a**

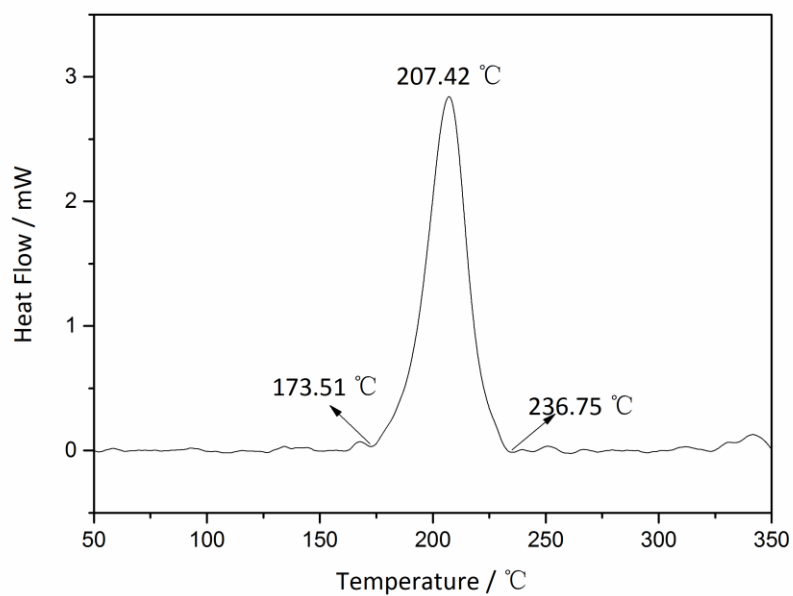

**Figure S22.** The DSC plot of compound **3b**

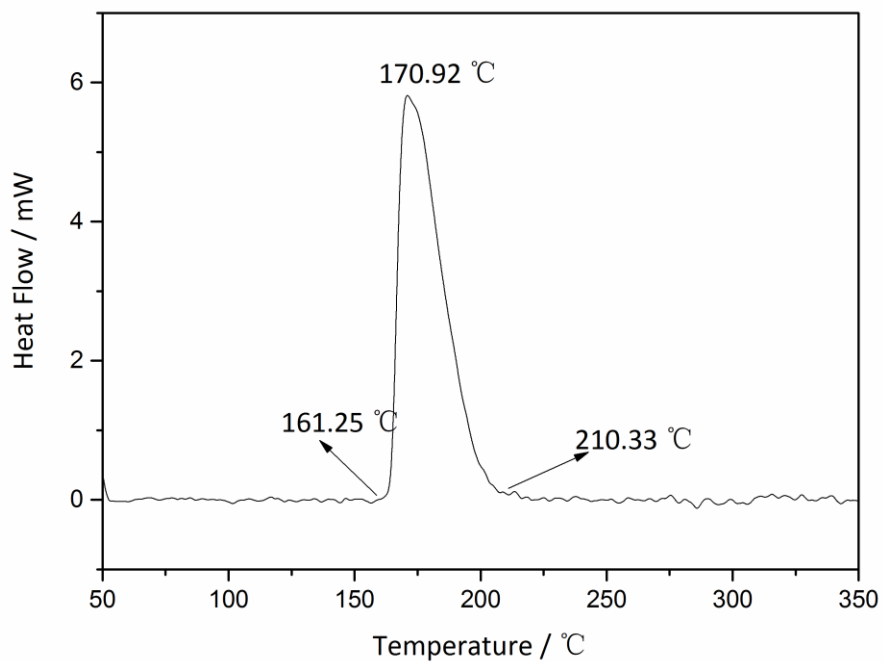

**Figure S23.** The DSC plot of compound **3c**

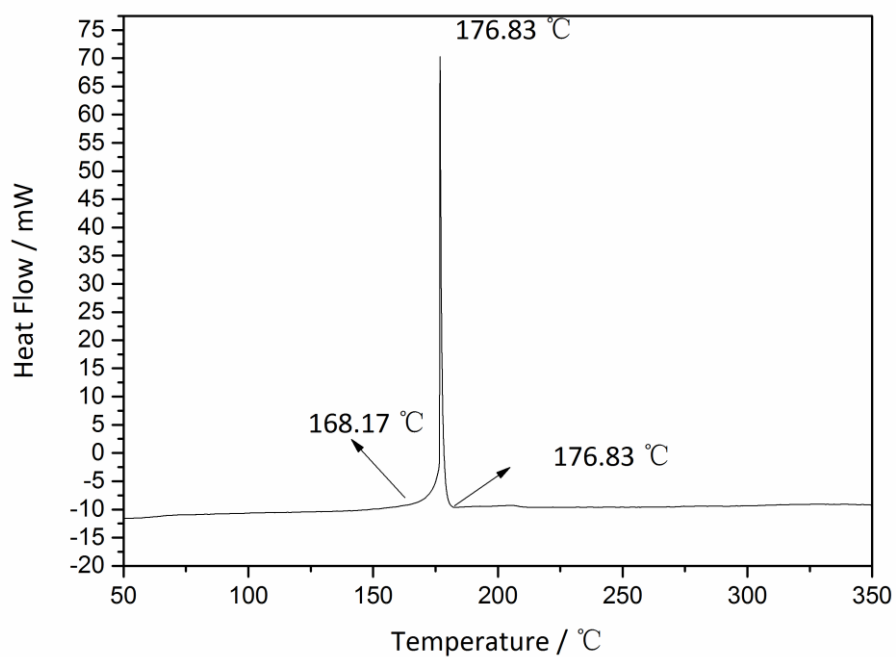

**Figure S24.** The DSC plot of compound **3d**

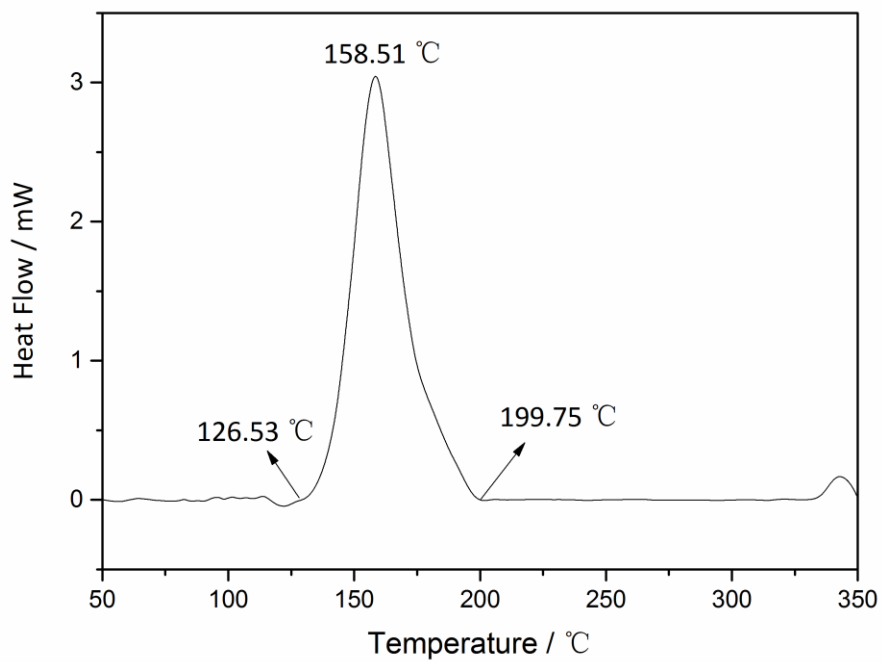

**Figure S25.** The DSC plot of compound **4**

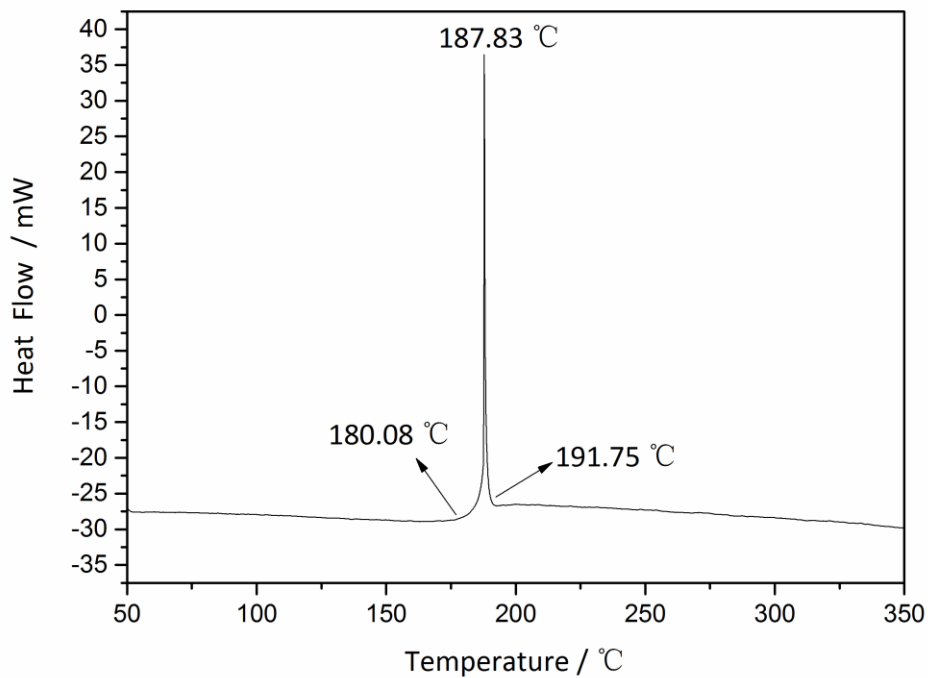

**Figure S26.** The DSC plot of compound **4a**

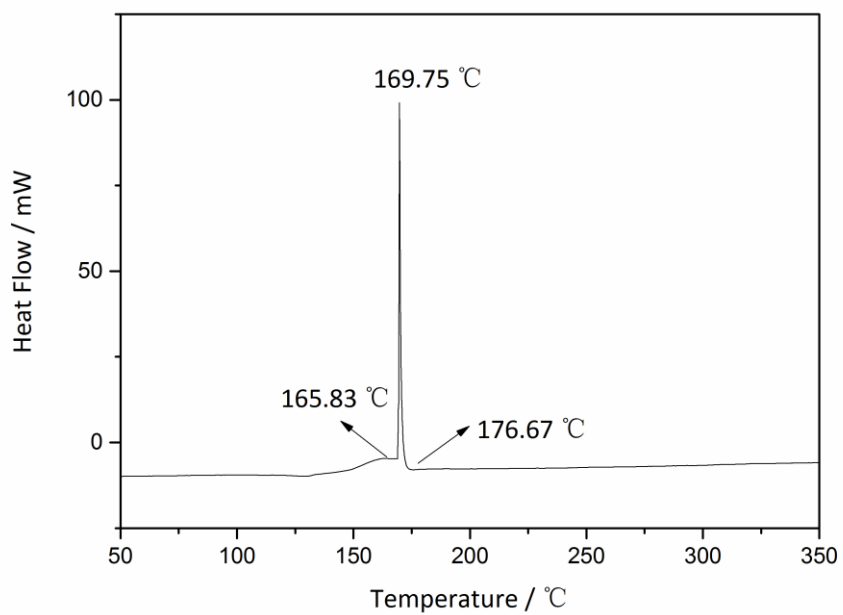

**Figure S27.** The DSC plot of compound **4b**

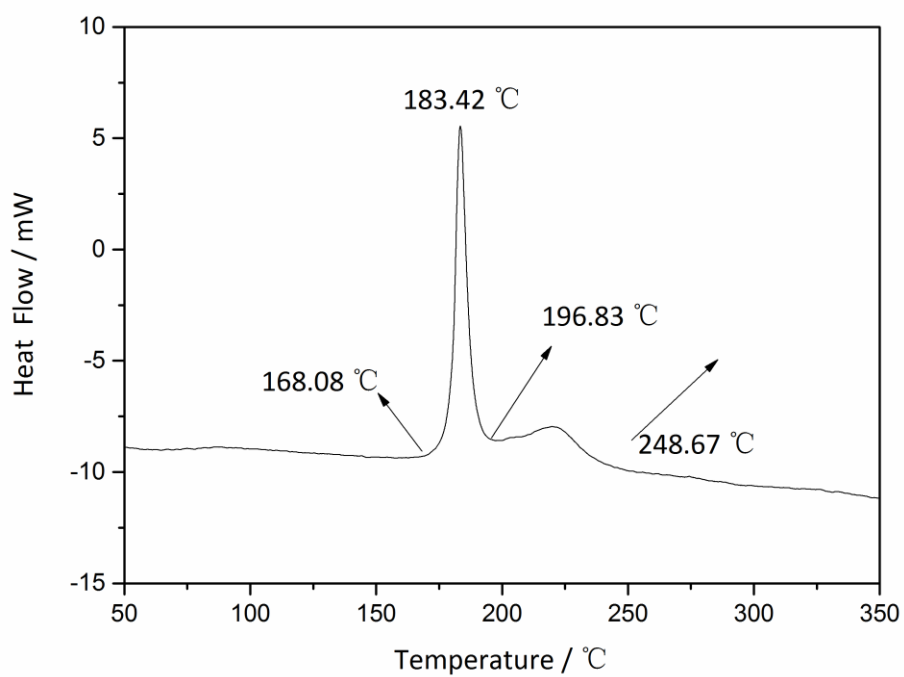

**Figure S28.** The DSC plot of compound **4c**

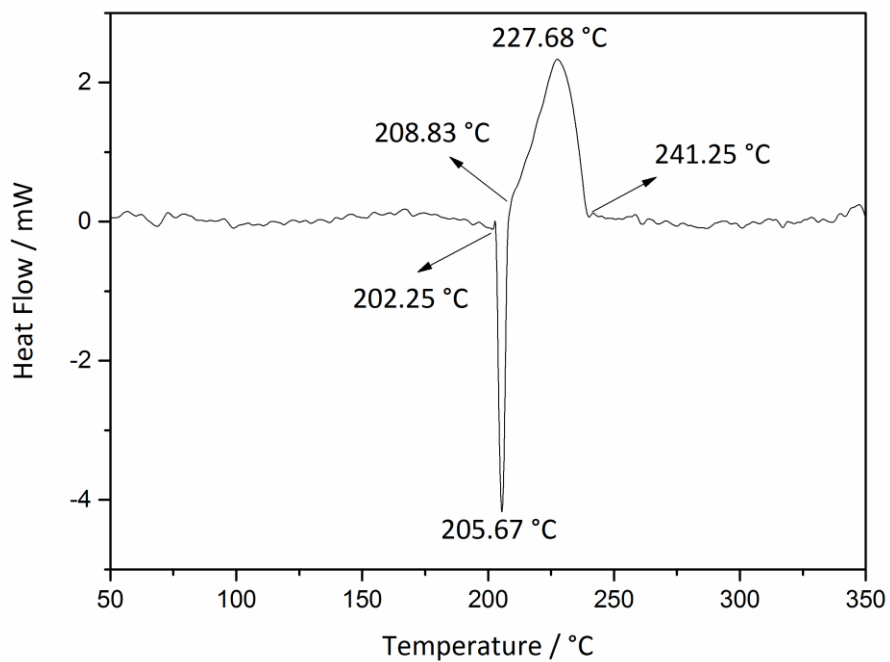

**Figure S29.** The DSC plot of compound RDX

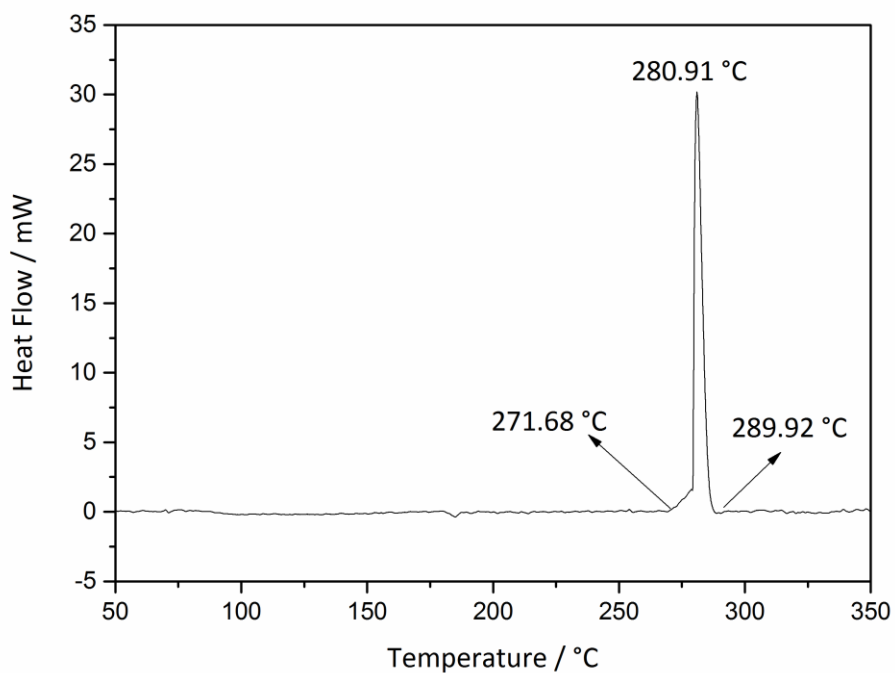

**Figure S30.** The DSC plot of compound HMX



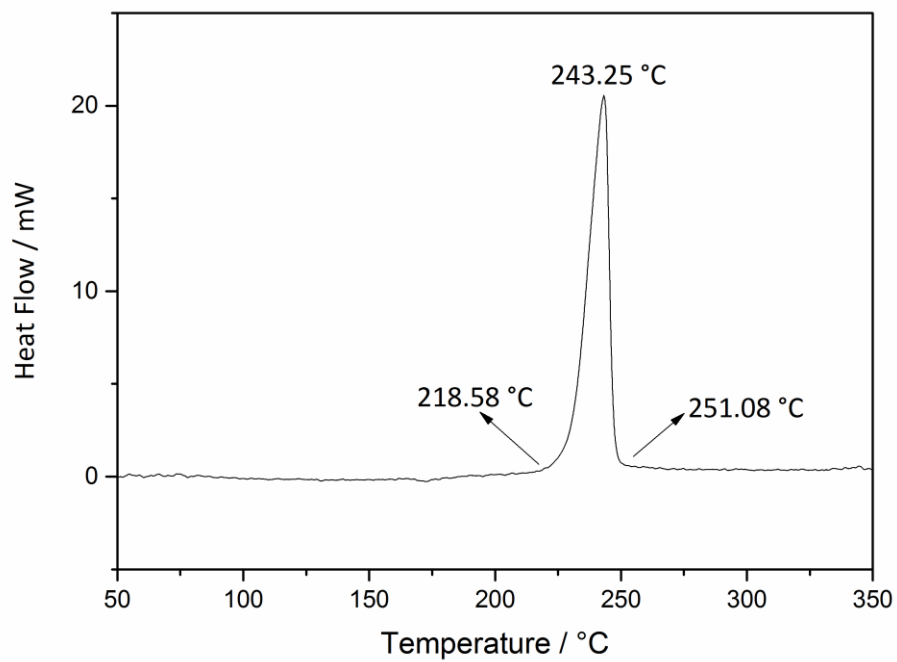

**Figure S31.** The DSC plot of compound CL-20

## 5. Reference

- [1] M. J. Frisch, et al. Gaussian 09, Revision D. 01 (Gaussian Inc., 2009).
- [2] A. D. Becke, *J. Chem. Phys.* 1993, **98**, 5648-5652
- [3] P. J. Stephens; F. J. Devlin; C. F. Chabalowski; M. J. Frisch. *J. Phys. Chem.* 1994, **98**, 11623-11627.
- [4] P. C. Hariharan; J. A. Pople, *Theor. Chim. Acta.* 1973, **28**, 213-222.
